# Supplementary material for: Evaluation of Microglia/Macrophage Cells from Rat Striatum and Prefrontal Cortex Reveals Differential Expression of Inflammatory-Related mRNA after Methamphetamine
Source: PubMed Central journal article supplement (PMC6955783; doi:10.3390/brainsci9120340), 2019-11-25
Supplement: brainsci-09-00340-s001.pdf [file brainsci-09-00340-s001.pdf]

**Supplementary Materials:** The following are available online at <http://www.mdpi.com/2076-3425/9/12/340/s1>, Table S1: Gene expression data for Figure 3, Table S2: Gene expression data for Figure 4, Table S3: Gene expression data for Figure 5, Table S4: Gene expression data for Figure 6, Table S5: Gene expression data for GABA transporters in microglia from the STR at 2 hr and 3 days after METH, Table S6: Gene expression data for *Csf1*, *Csfr1*, *Il34* in microglia from the STR at 2 hr and 3 days after METH.

Table S1: Gene expression data for Figure 3. PG and LT biosynthetic enzymes and LT receptors in 2 hr post METH STR and PFC microglia. ND = Not Detected. NS = Not Significant.

| Symbol  | Gene Name                                             | 2 hr STR<br>average<br>log2cpm<br>Saline (n=6),<br>METH (n=8) | 2 hr STR<br>Fold Change,<br>FDR | 2 hr PFC<br>average<br>log2cpm S<br>Saline (n=4),<br>METH (n=5) | 2 hr PFC<br>Fold Change,<br>FDR |
|---------|-------------------------------------------------------|---------------------------------------------------------------|---------------------------------|-----------------------------------------------------------------|---------------------------------|
| Pla2    | phospholipase A2,<br>activating protein               | 5.34, 5.95                                                    | 1.55, 3E-04                     | 5.34, 5.64                                                      | 1.25, 0.08 (NS)                 |
| Ptgs1   | prostaglandin-<br>endoperoxide<br>synthase 1 (COX1)   | 10.36, 9.70                                                   | -1.55, 3E-05                    | 10.15, 9.40                                                     | -1.65, 7.0E-07                  |
| Ptgs2   | prostaglandin-<br>endoperoxide<br>synthase 2 (COX2)   | -4.73, -0.62                                                  | 47.3, 2E-03                     | ND                                                              | ND                              |
| Alox5   | arachidonate 5-<br>lipoxygenase                       | 8.24, 8.11                                                    | -1.06, 0.79 (NS)                | 8.40, 8.98                                                      | 1.51, 0.01                      |
| Alox5ap | arachidonate 5-<br>lipoxygenase<br>activating protein | 7.67, 8.15                                                    | 1.43, 5.5E-04                   | 7.76, 8.49                                                      | 1.68, 3.6E-06                   |
| Lta4h   | leukotriene A4<br>hydrolase                           | 7.16, 7.58                                                    | 1.36, 4E-04                     | 7.12, 7.65                                                      | 1.46, 9E-06                     |
| Ptgr1   | prostaglandin<br>reductase 1                          | 2.02, 0.91                                                    | -1.98, 8.8E-04                  | 2.40, 0.89                                                      | -2.74, 7.0E-06                  |
| Ltb4r   | Leukotriene B4<br>Receptor                            | ND                                                            | ND                              | ND                                                              | ND                              |
| Ltc4s   | leukotriene C4<br>synthase                            | 8.11, 6.91                                                    | -2.1, 1E-05                     | 8.11, 7.35                                                      | -1.61, 9.0E-04                  |
| Ggt1    | gamma-<br>glutamyltransferase<br>1                    | ND                                                            | ND                              | ND                                                              | ND                              |

|         |                                  |             |              |              |                 |
|---------|----------------------------------|-------------|--------------|--------------|-----------------|
| Ggt7    | gamma-glutamyltransferase 7      | 4.15, 3.65  | -1.38, 0.045 | 4.20, 3.60   | -1.55, 0.04     |
| Dpep2   | dipeptidase 2                    | 3.59, 2.94  | -1.6, 6E-03  | 3.81, 3.05   | -1.72, 3.0E-04  |
| Cysltr1 | cysteinyl leukotriene receptor 1 | 4.48, 3.65  | -1.7, 9E-04  | 4.45, 4.06   | -1.3, 0.34 (NS) |
| Cysltr2 | cysteinyl leukotriene receptor 2 | ND          | ND           | ND           | ND              |
| P2ry12  | purinergic receptor P2Y12        | 10.88, 9.77 | -2.0, 5E-05  | 10.93, 10.23 | -1.6, 5.0E-05   |

Table S2: Gene expression data for Figure 4. Biosynthetic enzymes and receptors for PG's, TxA2, and HETE's in 2 hr post METH STR and PFC microglia. ND = Not Detected. NS= Not Significant.

| Symbol | Gene Name                                    | 2 hr STR average log2cpm<br>Saline (n=6),<br>METH (n=8) | 2 hr STR Fold Change, FDR | 2 hr PFC average log2cpm<br>Saline (n=4),<br>METH (n=5) | 2 hr PFC Fold Change, FDR |
|--------|----------------------------------------------|---------------------------------------------------------|---------------------------|---------------------------------------------------------|---------------------------|
| Plaa   | phospholipase A2, activating protein         | 5.34, 5.95                                              | 1.55, 3E-04               | 5.34, 5.64                                              | 1.25, 0.08 (NS)           |
| Ptgs1  | prostaglandin-endoperoxide synthase 1 (COX1) | 10.36, 9.70                                             | -1.55, 3E-05              | 10.15, 9.40                                             | -1.65, 7E-07              |
| Ptgs2  | prostaglandin-endoperoxide synthase 2 (COX2) | -4.73, -0.62                                            | 47.3, 2E-03               | ND                                                      | ND                        |
| Ptges2 | prostaglandin E synthase 2                   | 4.62, 5.41                                              | 1.76, 8E-06               | 1.24, 0.14 (NS)                                         | 4.63, 4.92                |
| Ptges3 | prostaglandin E synthase 3                   | 6.70, 8.04                                              | 2.60, 3E-11               | 6.92, 8.18                                              | 2.43, 1E-07               |
| Ptger1 | prostaglandin E receptor 1                   | 3.21, 3.86                                              | 1.61, 0.07 (NS)           | 3.32, 3.91                                              | 1.36, 0.22 (NS)           |
| Ptger2 | prostaglandin E receptor 2                   | 0.32, 2.56                                              | 5.0, 2E-05                | 0.56, 1.82                                              | 2.50, 0.01                |
| Ptger3 | prostaglandin E receptor 3                   | ND                                                      | ND                        | ND                                                      | ND                        |
| Ptger4 | prostaglandin E receptor 4                   | 2.88, 5.19                                              | 6.5, 3E-05                | 3.16, 4.45                                              | 2.64, 6E-03               |

|         |                                                             |              |                  |              |                  |
|---------|-------------------------------------------------------------|--------------|------------------|--------------|------------------|
| Alox15  | arachidonate 15-Lipoxygenase                                | ND           | ND               | ND           | ND               |
| Alox12  | arachidonate 12-lipoxygenase, 12S type                      | 6.60, 6.13   | -1.36, 0.11 (NS) | 6.92, 5.29   | -2.95, 3.3E-07   |
| Alox5   | arachidonate 5-lipoxygenase                                 | 8.24, 8.11   | -1.06, 0.79 (NS) | 8.40, 8.98   | 1.51, 0.01       |
| Alox5ap | arachidonate 5-lipoxygenase activating protein              | 7.67, 8.15   | 1.43, 5.5E-04    | 7.76, 8.49   | 1.68, 3.6E-06    |
| Ppard   | peroxisome proliferator-activated receptor delta            | 3.63, 4.23   | 1.54, 0.04       | 3.60, 4.26   | 1.55, 0.01       |
| Pparg   | peroxisome proliferator activated receptor gamma            | ND           | ND               | ND           | ND               |
| Angptl4 | angiopoietin-like 4                                         | 0.94, 2.42   | 4.20, 1.2E-04    | 0.45, 2.39   | 3.78, 1.4E-07    |
| Gpr31   | G protein-coupled receptor 31                               | 5.76, 3.30   | -4.25, 1.6E-05   | 5.61, 4.46   | -2.22, 4.3E-08   |
| Oxer1   | Oxoeicosanoid Receptor 1                                    | ND           | ND               | ND           | ND               |
| Tbxas1  | thromboxane A synthase 1                                    | 8.38, 8.17   | -1.16, 0.11 (NS) | 8.26, 7.92   | -1.28, 0.09 (NS) |
| Tbxa2r  | thromboxane A2 receptor                                     | -1.11, -1.31 | 1.42, 0.53 (NS)  | -1.07, -2.15 | -2.19, 0.21 (NS) |
| Ptgds   | prostaglandin D2 synthase                                   | ND           | ND               | ND           | ND               |
| Ptgdr   | prostaglandin D2 Receptor                                   | ND           | ND               | ND           | ND               |
| Prx12b  | peroxiredoxin like 2B (prostamide/prostaglandin F synthase) | ND           | ND               | ND           | ND               |
| Ptgfr   | Prostaglandin F Receptor                                    | ND           | ND               | ND           | ND               |
| Ptgis   | Prostaglandin I2 Synthase                                   | ND           | ND               | ND           | ND               |
| Ptgir   | prostaglandin I2 receptor                                   | -2.27, -0.59 | 2.82, 0.15 (NS)  | -1.48, -1.04 | 1.83, 0.43 (NS)  |

Table S3: Gene expression data for Figure 5. Significantly changed RNAseq genes associated with NRF2-mediated oxidative stress response via IPA®.

| Gene Symbol - rat<br>(Entrez Gene) | Entrez Gene Name                                     | Expr Fold Change | Expr False Discovery<br>Rate (q-value) |
|------------------------------------|------------------------------------------------------|------------------|----------------------------------------|
| <i>Bach1</i>                       | BTB domain and CNC homolog 1                         | 2.01             | 5.62E-03                               |
| <i>Cct7</i>                        | chaperonin containing TCP1 subunit 7                 | 2.95             | 1.54E-07                               |
| <i>Dnaja1</i>                      | DnaJ heat shock protein family (Hsp40) member A1     | 27.39            | 2.09E-07                               |
| <i>Dnaja4</i>                      | DnaJ heat shock protein family (Hsp40) member A4     | 37.00            | 3.84E-10                               |
| <i>Dnajb1</i>                      | DnaJ heat shock protein family (Hsp40) member B1     | 37.32            | 2.82E-05                               |
| <i>Dnajb4</i>                      | DnaJ heat shock protein family (Hsp40) member B4     | 6.25             | 2.76E-03                               |
| <i>Dnajb7</i>                      | DnaJ heat shock protein family (Hsp40) member B7     | 4.93             | 5.19E-04                               |
| <i>Dnajb11</i>                     | DnaJ heat shock protein family (Hsp40) member B11    | 2.59             | 1.47E-08                               |
| <i>Dnajc3</i>                      | DnaJ heat shock protein family (Hsp40) member C3     | 2.78             | 4.17E-08                               |
| <i>Enc1</i>                        | ectodermal-neural cortex 1                           | 2.22             | 8.20E-04                               |
| <i>Ephx1</i>                       | epoxide hydrolase 1                                  | -3.52            | 1.27E-03                               |
| <i>Fosl1</i>                       | FOS like 1, AP-1 transcription factor subunit (Fra1) | 11.11            | 2.54E-03                               |
| <i>Fth1</i>                        | ferritin heavy chain 1                               | 2.42             | 2.44E-06                               |
| <i>Ftl1</i>                        | ferritin light chain                                 | 2.09             | 3.18E-05                               |

|                                                                                             |                                                                                   |       |          |
|---------------------------------------------------------------------------------------------|-----------------------------------------------------------------------------------|-------|----------|
| <i>Gclc</i>                                                                                 | glutamate-cysteine<br>ligase catalytic subunit                                    | 9.13  | 2.01E-08 |
| <i>LOC501110 (GSTA2)</i>                                                                    | glutathione S-transferase<br>alpha 2                                              | -3.50 | 6.20E-05 |
| <i>Hmox1</i>                                                                                | heme oxygenase 1                                                                  | 74.84 | 1.53E-08 |
| <i>Hspb8</i>                                                                                | heat shock protein<br>family B (small) member<br>8 (Hsp22)                        | 4.86  | 1.72E-02 |
| <i>Jun</i>                                                                                  | Jun proto-oncogene, AP-<br>1 transcription factor<br>subunit                      | 3.28  | 2.61E-02 |
| <i>Maff</i>                                                                                 | MAF bZIP transcription<br>factor F                                                | 4.95  | 1.46E-02 |
| <i>Mafg</i>                                                                                 | MAF bZIP transcription<br>factor G                                                | 2.08  | 5.09E-06 |
| <i>Mafk</i>                                                                                 | MAF bZIP transcription<br>factor K                                                | 4.00  | 2.35E-04 |
| <i>Map2k6</i>                                                                               | mitogen-activated<br>protein kinase kinase 6                                      | -2.67 | 1.66E-05 |
| <i>Mgst3</i>                                                                                | microsomal glutathione<br>S-transferase 3                                         | -2.13 | 5.60E-05 |
| <i>Nfe2l2 (Nrf2)</i>                                                                        | nuclear factor, erythroid<br>2 like 2 (Nrf2)                                      | 2.97  | 1.33E-06 |
| <i>Nqo1</i>                                                                                 | NAD(P)H quinone<br>dehydrogenase 1                                                | 11.63 | 6.32E-05 |
| <i>Pik3c2b</i>                                                                              | phosphatidylinositol-4-<br>phosphate 3-kinase<br>catalytic subunit type 2<br>beta | 5.09  | 2.34E-04 |
| <i>Pmf1</i>                                                                                 | polyamine modulated<br>factor 1                                                   | -2.97 | 7.04E-08 |
| <i>Sod1</i>                                                                                 | superoxide dismutase 1                                                            | 3.98  | 2.16E-11 |
| <i>Stip1</i>                                                                                | stress induced<br>phosphoprotein 1                                                | 16.07 | 3.34E-12 |
| <i>Txnrd1</i>                                                                               | thioredoxin reductase 1                                                           | 3.39  | 5.67E-05 |
| Additional gene expression data related to NRF2-mediated oxidative stress response via IPA® |                                                                                   |       |          |

|                 |                                                            |       |          |
|-----------------|------------------------------------------------------------|-------|----------|
| <i>Hsp90aa1</i> | heat shock protein 90, alpha (cytosolic), class A member 1 | 30.58 | 2.75E-09 |
| <i>Hsp90ab1</i> | heat shock protein 90 alpha family class B member 1        | 12.78 | 2.76E-11 |

Table S4: Gene expression data for Figure 6. Hypothesized pathway and consequences of glutamine uptake in 2 hr post METH STR and PFC microglia. ND = Not Detected. NS = Not significant.

| Symbol         | Gene Name                                        | 2 hr STR average log2cpm<br>Saline (n=6),<br>METH (n=8) | 2 hr STR Fold Change, FDR | 2 hr PFC average log2cpm<br>Saline (n=4),<br>METH (n=5) | 2 hr PFC Fold Change, FDR |
|----------------|--------------------------------------------------|---------------------------------------------------------|---------------------------|---------------------------------------------------------|---------------------------|
| <i>Slc7a6</i>  | solute carrier family 7 member 6                 | 6.67, 7.00                                              | 1.30, 0.02                | 6.69, 6.51                                              | -1.09, 0.59 (NS)          |
| <i>Slc38a7</i> | solute carrier family 38, member 7               | 5.34, 6.05                                              | 1.70, 2.8E-04             | 5.39, 5.83                                              | 1.38, 0.02                |
| <i>Slc1a5</i>  | solute carrier family 1 member 5                 | 3.71, 5.50                                              | 3.52, 1.6E-03             | 3.69, 3.83                                              | 1.47, 0.42 (NS)           |
| <i>Slc38a1</i> | solute carrier family 38, member 1               | -2.78, -2.73                                            | -1.20, 0.68 (NS)          | -1.57, -2.03                                            | -1.36, 0.71 (NS)          |
| <i>Slc1a3</i>  | solute carrier family 1 member 3 (EAAT1, GLAST1) | 10.08, 9.33                                             | -1.61, 6.3E-06            | 10.09, 8.90                                             | -2.29, 8.3E-10            |
| <i>Slc1a2</i>  | solute carrier family 1 member 2 (EAAT2, GLT1)   | 0.33, 0.40                                              | 1.27, 0.61 (NS)           | 0.08, 0.33                                              | 1.03, 0.97 (NS)           |
| <i>Slc7a11</i> | solute carrier family 7 member 11                | -0.59, 1.11                                             | 4.22, 0.01                | -0.75, -0.37                                            | 1.39, 0.63 (NS)           |

|                                                                                                                    |                                              |              |                  |              |                  |
|--------------------------------------------------------------------------------------------------------------------|----------------------------------------------|--------------|------------------|--------------|------------------|
| <i>Gls</i>                                                                                                         | glutaminase                                  | 5.91, 5.92   | 1.02, 0.92 (NS)  | 5.99, 5.80   | -1.17, 0.17 (NS) |
| <i>Gls2</i>                                                                                                        | glutaminase 2                                | 0.83, 1.50   | 1.58, 0.08 (NS)  | 0.88, 1.49   | 1.49, 0.16 (NS)  |
| <i>Glul</i>                                                                                                        | glutamate-ammonia ligase                     | 10.26, 10.38 | 1.12, 0.41 (NS)  | 10.34, 10.83 | 1.41, 4.2E-03    |
| <i>Glud1</i>                                                                                                       | glutamate dehydrogenase 1                    | 7.98, 7.42   | -1.46, 3.4E-05   | 8.17, 7.64   | -1.44, 3.1E-05   |
| <i>Gclc</i>                                                                                                        | glutamate-cysteine ligase, catalytic subunit | 5.15, 8.14   | 9.13, 2.0E-08    | 5.09, 6.85   | 3.63, 2.8E-08    |
| <i>Gss</i>                                                                                                         | glutathione synthetase                       | 4.09, 3.87   | -1.11, 0.59 (NS) | 4.13, 3.64   | -1.39, 0.02      |
| <i>Gpx8</i>                                                                                                        | glutathione peroxidase 8                     | 3.58, 2.69   | -1.79, 1.8E-03   | 3.76, 3.27   | -1.37, 0.02      |
| Other Gpx's detected                                                                                               |                                              |              |                  |              |                  |
| <i>Gpx1</i>                                                                                                        | glutathione peroxidase 1                     | 8.57, 8.28   | -1.20, 0.12 (NS) | 8.70, 8.82   | 1.10, 0.50 (NS)  |
| <i>Gpx3</i>                                                                                                        | glutathione peroxidase 3                     | -0.97, -0.80 | 1.11, 0.81 (NS)  | -1.38, -2.08 | -1.03, 0.97 (NS) |
| <i>Gpx4</i>                                                                                                        | glutathione peroxidase 4                     | 6.95, 6.79   | -1.11, 0.30 (NS) | 7.20, 7.10   | -1.06, 0.66 (NS) |
| <i>Gpx7</i>                                                                                                        | glutathione peroxidase 7                     | -3.87, -1.78 | 2.06, 0.22 (NS)  | ND           | ND               |
| <i>Gsr</i>                                                                                                         | glutathione-disulfide reductase              | 5.82, 6.04   | 1.20, 0.37 (NS)  | 5.79, 5.71   | -1.06, 0.59 (NS) |
| Gst's: 17 glutathione-S-transferases were detected in the STR, 16 in the PFC. Those with FDR<0.05 are shown below. |                                              |              |                  |              |                  |
| <i>LOC501110</i>                                                                                                   | similar to glutathione S-transferase A1      | 1.58, -0.52  | -3.50, 6.2E-05   | ND           | ND               |
| <i>Gstm1</i>                                                                                                       | glutathione S-transferase mu 1               | ND           | ND               | 3.68, 4.31   | 1.56, 0.01       |

|              |                                        |             |                |            |                  |
|--------------|----------------------------------------|-------------|----------------|------------|------------------|
| <i>Gstm4</i> | glutathione S-transferase mu 4         | ND          | ND             | 4.41, 3.85 | -1.47, 1.5E-03   |
| <i>Gstt1</i> | glutathione S-transferase theta 1      | 0.58, -0.90 | -2.76, 2.4E-04 | ND         | ND               |
| <i>Gstz1</i> | glutathione S-transferase zeta 1       | 3.57, 2.89  | -1.51, 0.03    | 3.76, 3.20 | -1.45, 0.03      |
| <i>Mgst3</i> | microsomal glutathione S-transferase 3 | 3.03, 1.91  | -2.13, 5.6E-05 | 3.10, 2.28 | -1.75, 1.9E-04   |
| <i>Sod1</i>  | superoxide dismutase 1, soluble        | 5.06, 7.00  | 3.98, 2.2E-11  | 5.12, 7.13 | 4.09, 1.1E-09    |
| <i>Cat</i>   | catalase                               | 6.42, 5.96  | -1.35, 5.8E-03 | 6.52, 6.34 | -1.13, 0.37 (NS) |

Table S5: Gene expression data for GABA transporters in microglia from the STR at 2 hr and 3 days after METH. NS = Not significant.

| Symbol         | Gene Name                         | 2 hr STR average log2cpm Saline (n=6), METH (n=8) | 2 hr STR Fold Change, FDR | 3 day STR average log2cpm Saline (n=4), METH (n=5) | 3 day STR Fold Change, FDR |
|----------------|-----------------------------------|---------------------------------------------------|---------------------------|----------------------------------------------------|----------------------------|
| <i>Slc6a12</i> | solute carrier family 6 member 12 | -0.32, 3.84                                       | 16.60, 5.4E-07            | -0.33, 1.07                                        | 2.76, 3.2E-04              |
| <i>Slc6a1</i>  | solute carrier family 6 member 1  | 1.27, 1.47                                        | 1.06, 0.91 (NS)           | -0.73, -2.62                                       | -2.00, 0.54 (NS)           |



Table S6: Gene expression data for *Csf1*, *Csfr1*, *Il34* in microglia from the STR at 2 hr and 3 days after METH. NS = Not significant.

| Symbol       | Gene Name                            | 2 hr STR<br>average<br>log2cpm<br>Saline (n=6),<br>METH (n=8) | 2 hr STR<br>Fold Change,<br>FDR | 3 day STR<br>average<br>log2cpm<br>Saline (n=4),<br>METH (n=5) | 3 day STR<br>Fold Change,<br>FDR |
|--------------|--------------------------------------|---------------------------------------------------------------|---------------------------------|----------------------------------------------------------------|----------------------------------|
| <i>Csf1</i>  | colony stimulating factor 1          | 1.54, 4.91                                                    | 12.52, 7.6E-09                  | -0.60, 0.52                                                    | 2.42, 4.6E-03                    |
| <i>Csfr1</i> | colony stimulating factor 1 receptor | 13.48, 13.62                                                  | 1.10, 0.54 (NS)                 | 11.73, 11.60                                                   | -1.06, 0.90 (NS)                 |
| <i>Il34</i>  | interleukin 34                       | -1.52, -1.56                                                  | 1.18, 0.76 (NS)                 | -2.01, -0.27                                                   | 3.23, 0.02                       |
